# Supplementary material
Source: Springer Nature journal article supplement (https://www.springermedizin.de/resource/supplementary/12889_2010_3011_MOESM3_ESM.pdf/9487842)

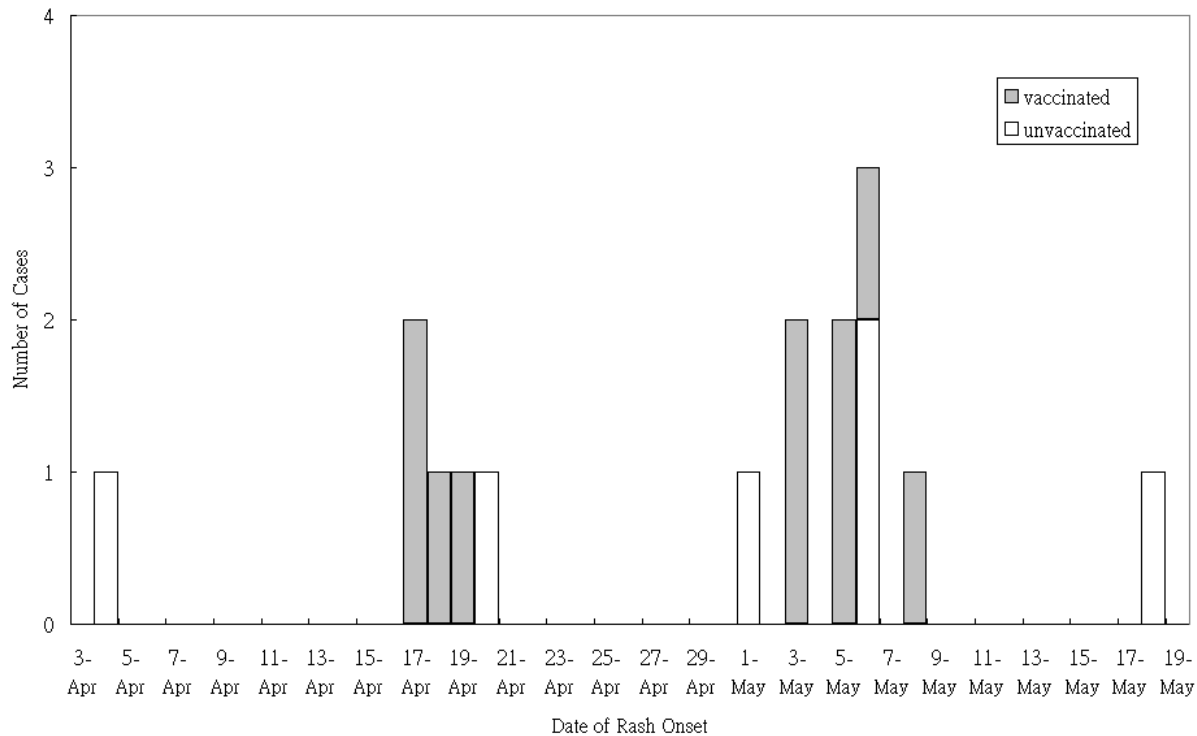

Supplement: MOESM3 [file 9487842]
